# Supplementary material
Source: publisher site journal article supplement (https://www.dovepress.com/article/191905)
Supplement: Supplementary file 1 [file get_supplementary_file.php]

**Supplementary materials**

A chemoenzymatically synthesized cholesterol-*g*-poly(amine-*co*-ester) mediated p53 gene delivery for achieving anti-tumor efficacy in prostate cancer


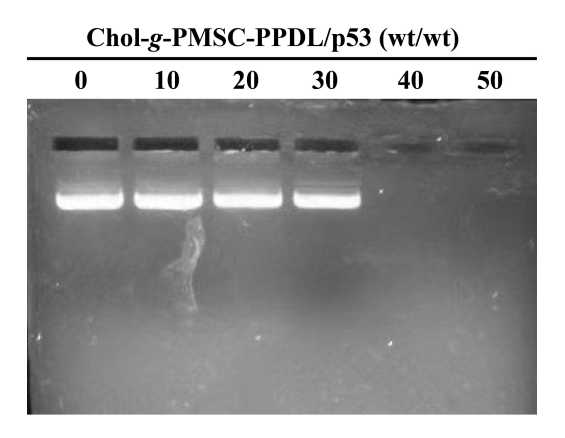


**Figure S1** Gel retardation assay for the binding and condensation ability of Chol-*g*-PMSC-PPDL with the plasmid p3XFLAG-CMV-p53 at different mass ratios.


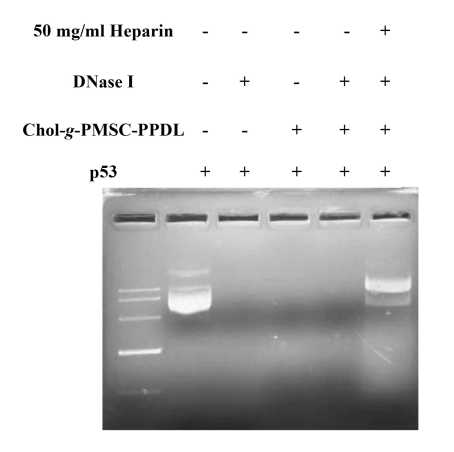


**Figure S2** Gel retardation assay of Chol-*g*-PMSC-PPDL/p53 nanoparticles at a mass ratio of 40.0 after the treatment of 10 µg/mL of DNase I for 15 min.


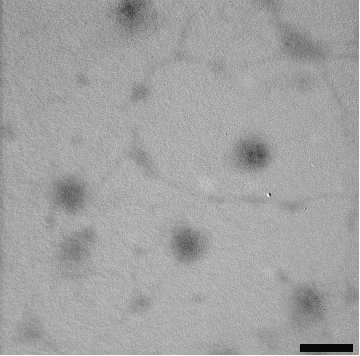


**Figure S3** The TEM image of Chol-*g*-PMSC-PPDL/p53 nanoparticles at a mass ratio of 40.0. The scale bar is 200 nm.


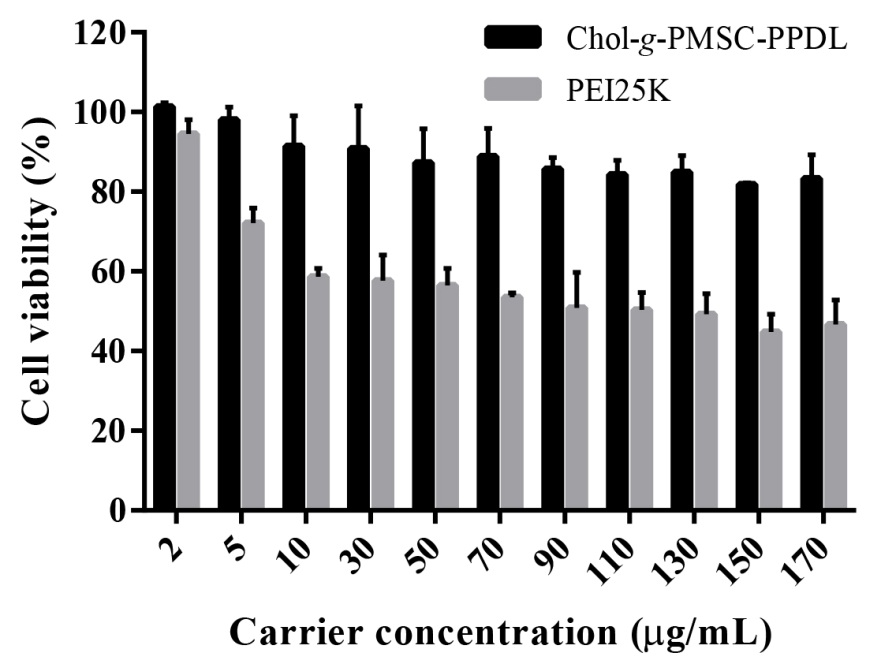


**Figure S4** *In vitro* cytotoxicity analysis of PEI25K and Chol-*g*-PMSC-PPDL at different concentrantions by MTT method. Data are presented as mean value ± SD of triplicate experiments.


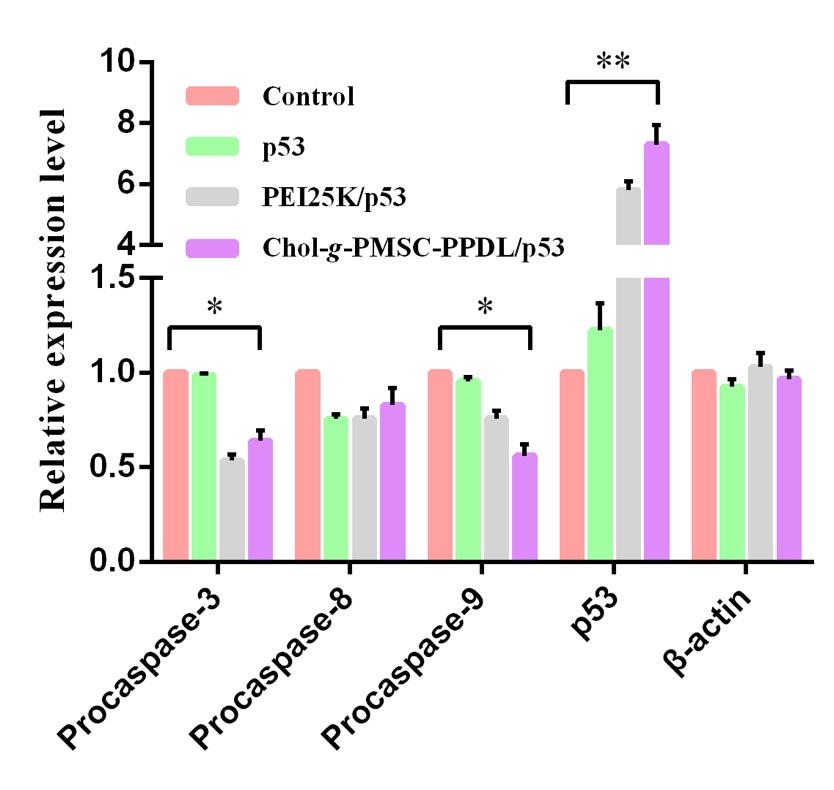


**Figure S5**  Quantitative analysis for the expression level of specific proteins in PC-3 cells after p53 transfection by different carriers. The assay was conducted using the software Image J.


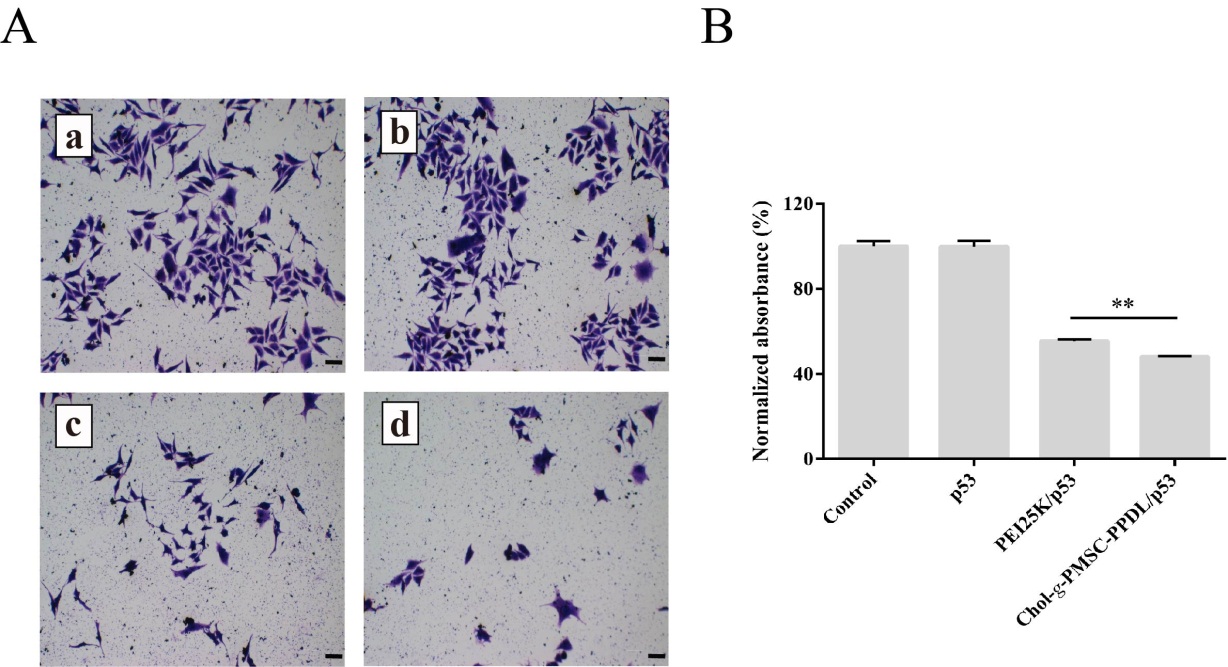


**Figure S6** The inhibition of colony formation after p53 transfection (A) and the quantitative analysis through the measurement of optical density at 578 nm of eluent (B): (a) control; (b) free p53 plasmid; (c) PEI25K/p53; and (d) Chol-*g*-PMSC-PPDL/p53. Data are presented as mean value ± SD of triplicate experiments. The scale bar is 100 μm.


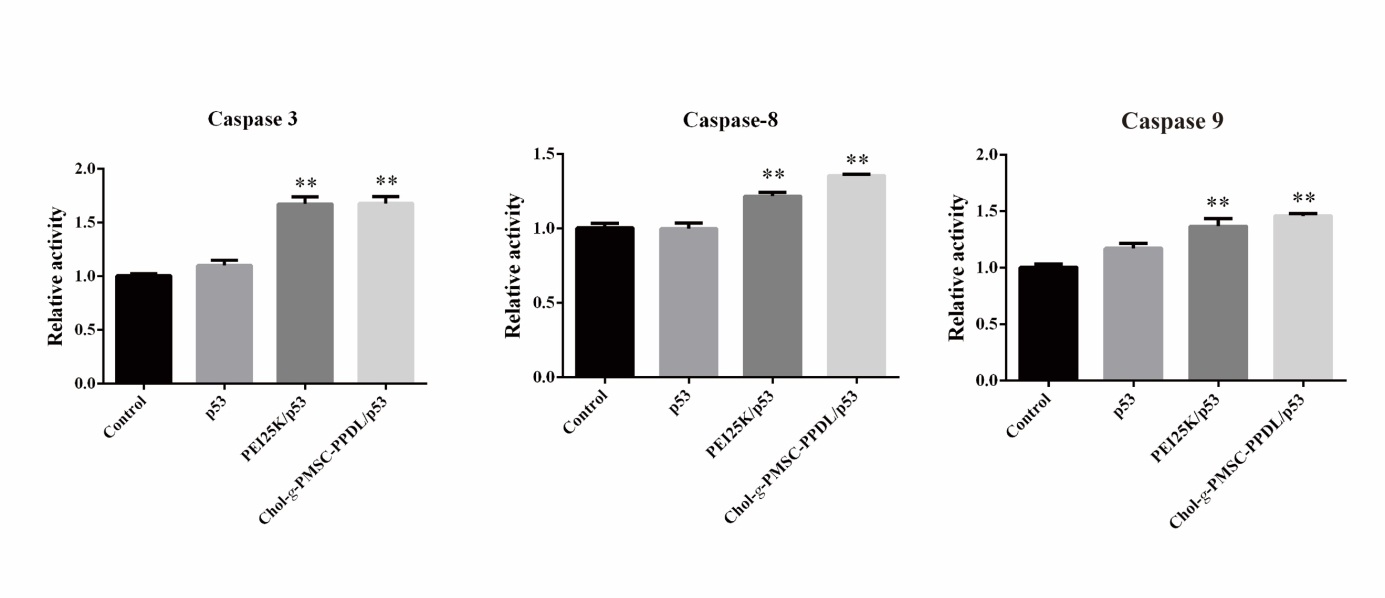


**Figure S7**  The caspase activity measurement after p53 transfection by the corresponding detection kits. Data are presented as the mean value ± SD of triplicate experiments.


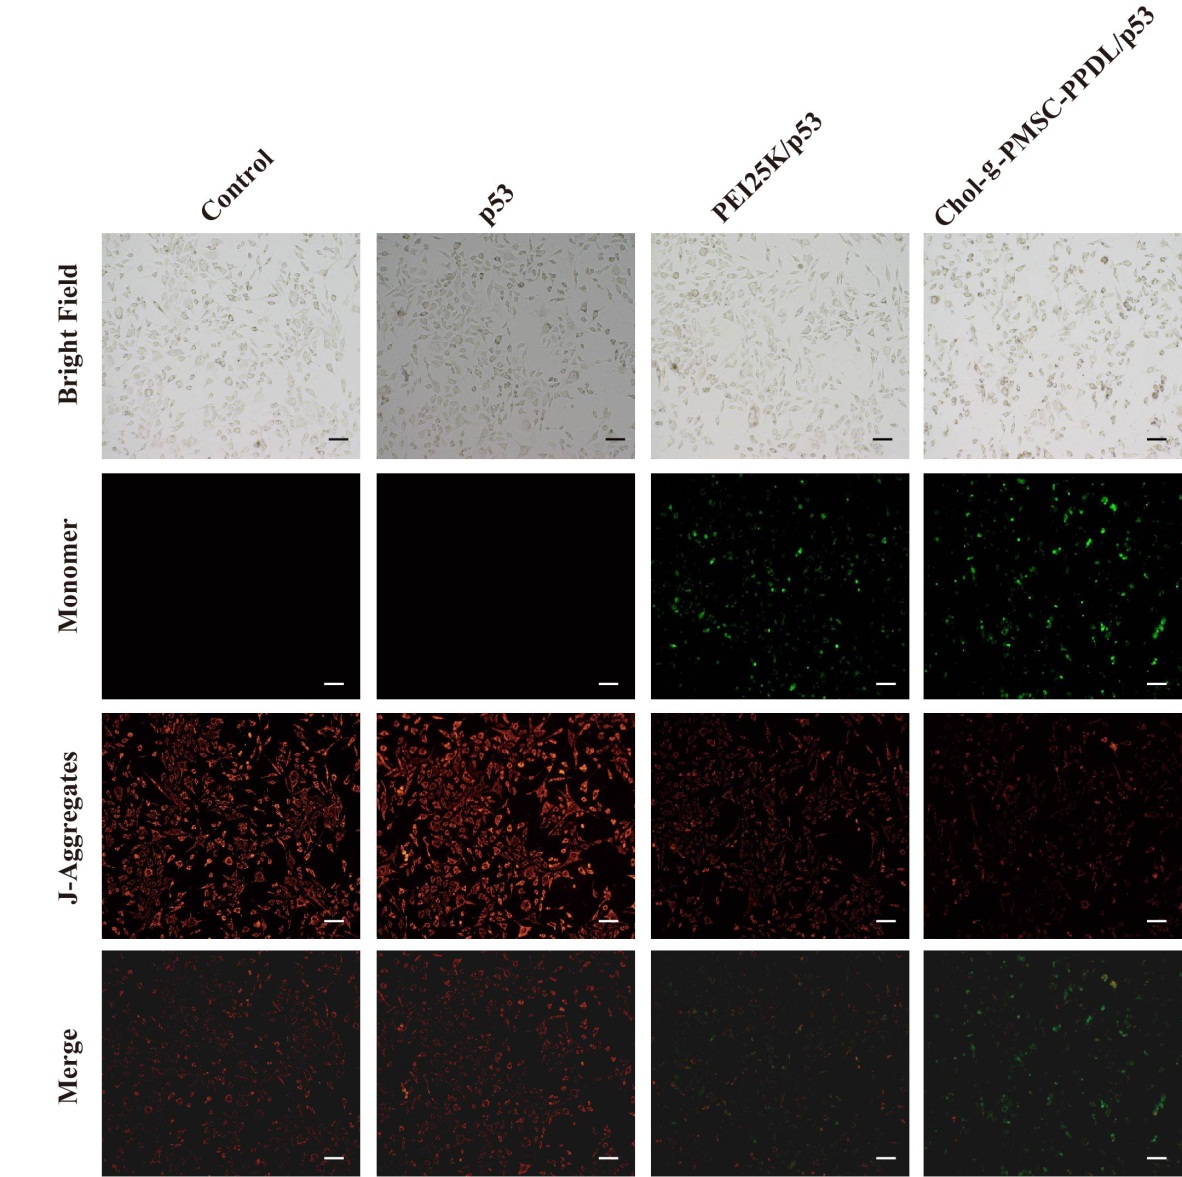


**Figure S8**Mitochondrial membrane potential analysis of PC-3 cells after p53 transfection mediated by different carriers. The scale bar is 100 μm.


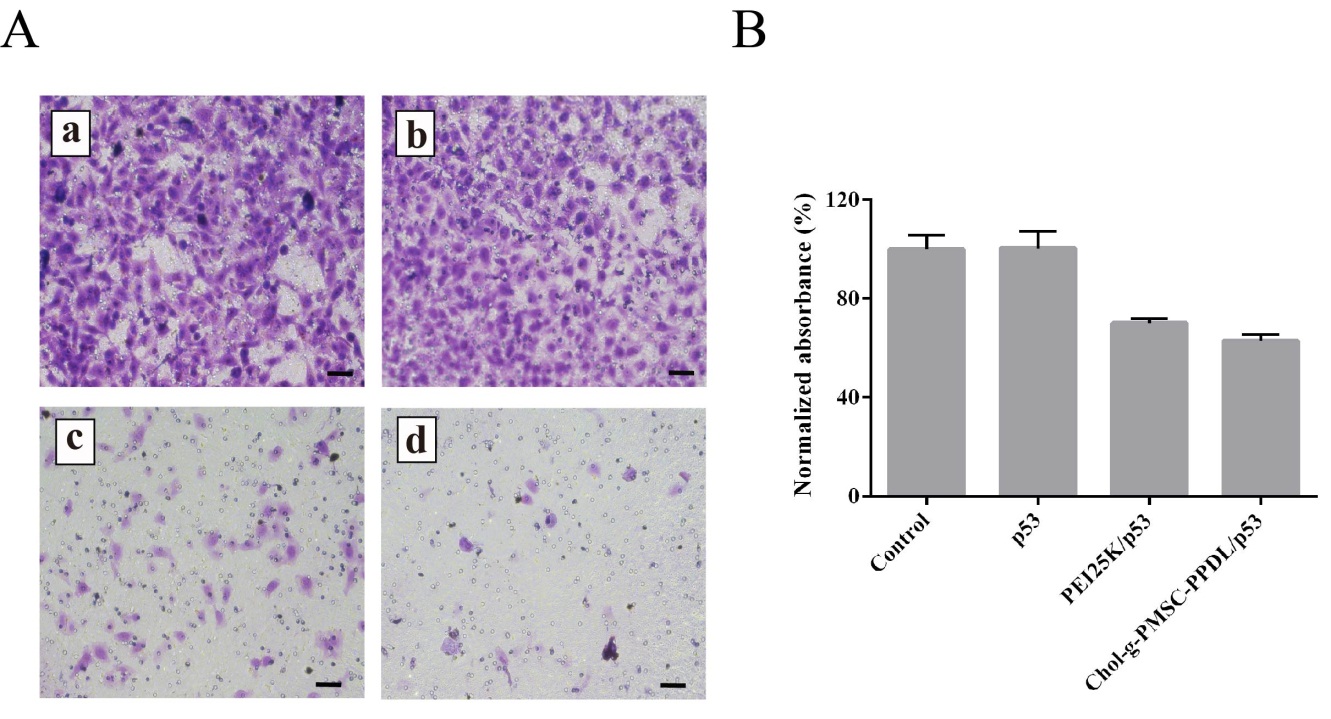


**Figure S9**  Transwell migration assay of PC-3 cells after p53 transfection (A) and the quantitative analysis (B): (a) control; (b) free p53 plasmid; (c) PEI25K/p53 and (d) Chol-*g*-PMSC-PPDL/p53. Data are presented as the mean value ± SD of triplicate experiments. The scale bar is 50 μm.
